1 **Real world performance of inactivated SARS-CoV-2 vaccine (CoronaVac) against**  
2 **infection, hospitalization and death due to COVID-19 in adult population in Indonesia**

3  
4 Anton Suryatma<sup>1\*</sup>, Raras Anasi<sup>2</sup>, Miko Hananto<sup>2</sup>, Asep Hermawan<sup>1</sup>, Ririn Ramadhany<sup>3</sup>, Irene  
5 Lorinda Indalao<sup>3</sup>, Agustiningsih Agustiningsih<sup>1</sup>, Ely Hujjatul Fikriyah<sup>2</sup>, Kristina Lumban  
6 Tobing<sup>1</sup>, Teti Tejayanti<sup>2</sup>, Rustika Rustika<sup>1</sup>, Pandji Wibawa Dhewantara<sup>1\*</sup>

7  
8 <sup>1</sup> National Agency for Research and Innovation, Jl. M.H. Thamrin No. 8, Jakarta 10340,  
9 Indonesia

10 <sup>2</sup> Center for Policy on Global Health and Health Technology, Institute of Health Policy  
11 Development, Ministry of Health of Indonesia, Jl. Percetakan Negara No. 29, Jakarta 10560,  
12 Indonesia

13 <sup>3</sup> Center for Policy on Health System and Resources, Institute of Health Policy Development,  
14 Ministry of Health of Indonesia, Jl. Percetakan Negara No. 29, Jakarta 10560, Indonesia

15  
16 \*Authors contributed equally

17  
18 Correspondence: Anton Suryatma, MD, MPH., National Agency for Research and Innovation,  
19 Jl. M.H. Thamrin No. 8, Jakarta 10340, Indonesia. Email: [drantonsuryatma@gmail.com](mailto:drantonsuryatma@gmail.com)

20  
21  
22  
23  
24  
25  
26  
27  
28  
29  
30  
31  
32  
33  
34  
35  
36  
37  
38  
39  
40  
41  
42

43 **Abstract**

44 **Background:** Inactivated SARS-CoV-2 vaccine has been included in the national COVID-19  
45 vaccination program in Indonesia since January 2021. The study aims to assess the impacts of  
46 inactivated COVID-19 vaccine on infection, hospitalization, and death among adult population  
47 aged  $\geq 18$  years in Bali, Indonesia.

48 **Methods:** Test-negative, case control study was conducted by linking SARS-CoV-2 laboratory  
49 records, vaccination, and health administrative data for the period of January 13 to June 30,  
50 2021. Case-subjects were defined as individuals who had a positive RT-PCR test for SARS-  
51 CoV-2 during the period; they were matched with controls (tested negative) (1:1) based on age,  
52 sex, district of residence, and week of testing. We estimated the odds of vaccination in PCR  
53 confirmed, hospitalization and death due to COVID-19, accounting for the presence of  
54 comorbidities and prior infection. Vaccine effectiveness was estimated as  $(1 - \text{odds ratio}) \times$   
55  $100\%$ .

56 **Results:**

57 Total 109,050 RT-PCR test results were retrieved during the January 13 to June 30, 2021. Of  
58 these, 14,168 subjects were eligible for inclusion in the study. Total 5518 matched case-control  
59 pairs were analyzed. Adjusted vaccine effectiveness (VE) against laboratory-confirmed SARS-  
60 CoV-2 infection was 14.5% (95% confidence interval -11 to 34.2) at 0-13 days after the first  
61 dose; 66.7% (95% CI: 58.1- 73.5) at  $\geq 14$  days after the second dose. The adjusted effectiveness  
62 against hospitalization and COVID-19-associated death was 71.1% (95% CI: 62.9-77.6) and  
63 87.4% (95% CI: 65.1-95.4%) at  $\geq 14$  days after receiving the second dose, respectively.

64 **Conclusions:** Two-dose of inactivated CoronaVac vaccine showed high effectiveness against  
65 laboratory confirmed COVID-19 infection, hospitalization, and death associated with COVID-  
66 19 among adults aged  $\geq 18$  years.

67 **Keywords:** inactivated vaccine, COVID-19, effectiveness, test-negative, Indonesia

## 68 **Introduction**

69 Indonesia rolled-out the first phase of mass vaccination program on January 13th, 2021, using  
70 the inactivated SARS-CoV-2 vaccine, CoronaVac, manufactured by Sinovac Life Sciences,  
71 Beijing, China. In the first phase, mass COVID-19 vaccination was targeting healthcare  
72 workers and general population including adults and elderly. A phase 1 and 2 clinical trial in  
73 China indicated that CoronaVac was tolerable, with acceptable safety and immunogenicity, and  
74 therefore supported the conduct of a phase 3 clinical trial in three countries including Indonesia  
75 [1]. The efficacy of CoronaVac varied among the countries, ranging from 50.7% to 84% against  
76 SARS-CoV-2 infection [2-4]. In Indonesia, two doses of CoronaVac vaccine had an efficacy  
77 of 65.3% against COVID-19 illness after 14 days of injection; this supported the approval of  
78 emergency use authorization (EUA) by the Indonesia National Agency of Drug and Food  
79 Control (NADFC) [2, 5].

80 Evidence regarding the real-world effectiveness of inactivated CoronaVac vaccine against  
81 SARS-CoV-2 infection, hospitalization, and death related with COVID-19 have been reported  
82 in number of countries such as Chile, Turkey, and Brazil [6, 7]. These studies suggest that the  
83 effectiveness of CoronaVac was varied from region to region. Therefore, since the performance  
84 in the population found to be different from that reported efficacy under controlled trial  
85 circumstances, post-licensure vaccine effectiveness evaluation at the population level is crucial  
86 [8]. In Indonesia, study on evaluating CoronaVac vaccine performance in preventing COVID-  
87 19 infection and severe outcomes is still limited especially in adults aged 18 years and above.  
88 The objective of this study was to estimate vaccine effectiveness (VE) of inactivated  
89 CoronaVac vaccine against COVID-19 infection, hospitalization, and COVID-19-related death  
90 among adult aged  $\geq 18$  years in Bali.

91

92

## 93 **Materials and methods**

### 94 *Setting and design*

95 Bali is a one of the popular tropical islands in Indonesia, with a total land area of 5780 km<sup>2</sup>  
96 and population of more than 4.3 million [9]. Mass COVID-19 vaccination using inactivated  
97 SARS-CoV-2 (CoronaVac) was initiated by the Ministry of Health of Indonesia on January  
98 13, 2021, across Indonesia, including in Bali. As of July 31, 2021, COVID-19 vaccines have  
99 been given to 2.8 million (41.9%) of the targeted Balinese population. About 2.2 million  
100 people aged  $\geq 18$  years had received at least one dose of COVID-19 vaccines (Supplementary  
101 Figure S1); 1.2 million (43.1%) had received at least one dose of inactivated CoronaVac  
102 vaccine [10]. The observation was conducted during January 13 to June 30, 2021. During  
103 the study period, the incidence of COVID-19 was increased during January-February and  
104 followed with a declining trend from March to June 2021. There was a sharp increase in  
105 incidence in July due to B.1.617.2 (Delta) variants (Figure 2, Supplementary Figure S2).  
106 We conducted a record-based retrospective, test-negative, matched case control (1:1) study  
107 to evaluate the effectiveness of inactivated CoronaVac vaccine in preventing laboratory  
108 confirmed SARS-CoV-2 infection, among adults (aged  $\geq 18$  years) during January to June  
109 2021. This test negative design was chosen due to several reasons. First, accessibility to  
110 individual data who were laboratory-tested for SARS-CoV-2 was feasible through the  
111 national surveillance system; second, it was cost-effective and allowed for faster results; and  
112 lastly, the design could better control for potential biases, including healthcare seeking  
113 behavior and access to COVID-19 testing [11].

114

### 115 *Data sources*

116 We linked individual health electronic databases including SARS-CoV-2 reverse-transcription  
117 polymerase chain reaction (RT-PCR) test results from the national laboratory testing database

118 (New All Record), COVID-19 vaccination registry, and hospitalization claims, managed by the  
119 Ministry of Health of Indonesia, using unique national citizen identification number. Data with  
120 foreign identification number and driving license number were excluded. We also checked the  
121 consistency in identification number, name, date of birth and sex between these databases.  
122 Confirmatory SARS-CoV-2 PCR test was performed on naso and/or oropharyngeal swab  
123 specimens in COVID-19 reference laboratories.[12]

124

#### 125 *Selection of cases and matched controls*

126 Cases were adults aged  $\geq 18$  years identified as those who had at least one COVID-19-like  
127 symptom (fever with body temperature documented at  $\geq 38^{\circ}\text{C}$ , chills, cough, shortness of  
128 breath, fatigue or malaise, sore throat, headache, runny nose, congestion, muscle aches, nausea  
129 or vomiting, diarrhea, abdominal pain, altered sense of smell or taste) and were tested RT-PCR  
130 positive for SARS-CoV-2, between January 13 to June 30, 2021; were not confirmed as positive  
131 for SARS-CoV-2 in the last 90 days before the index date; and those who did not receive any  
132 COVID-19 vaccines other than CoronaVac before sample collection. Controls were defined as  
133 those who had negative RT-PCR test results during the same period, irrespective for symptoms;  
134 and who did not receive any COVID-19 vaccines other than CoronaVac before sample  
135 collection. Cases and control were matched based on age, sex, district of residence and week of  
136 sample collection/testing.

137

#### 138 *Vaccination status*

139 Vaccination status of the subjects was determined by referring to linked individual vaccination  
140 record and was determined based on their SARS-CoV-2 test date. Fully vaccinated cases and  
141 controls were defined as having two doses of CoronaVac at least 14 days before the sample  
142 collection date. Adults who received no single dose of CoronaVac vaccine were defined as

143 unvaccinated and all other adults who received one dose at least 14 days before sample  
144 collection date were defined as partially vaccinated.

145

#### 146 *Statistical analysis*

147 Unadjusted and adjusted odds of vaccination between test-positive and test-negative pairs were  
148 estimated using conditional logistic regression. Odds ratios (ORs) and 95% confidence interval  
149 (CI) of vaccination in cases and controls was compared. Adjusted ORs were estimated from  
150 models including age (by year, as continuous) and presence of comorbidities and prior SARS-  
151 CoV-2 infection. There was a considerable proportion of missing data for comorbidities (79%).  
152 Multiple imputation was performed with considering for covariates (age, sex, residence) and  
153 outcome. Vaccine effectiveness (VE) was calculated as  $(1-OR) \times 100\%$  and 95% CIs for  
154 vaccine effectiveness estimates as  $100 \times (1 - \text{upper or lower bounds of 95\% CI for adjusted OR})$   
155 [13].

156 The effectiveness of CoronaVac against secondary outcomes (hospitalization and death due to  
157 COVID-19) were estimated using a multivariable logistic regression, accounting for covariates  
158 such as age, sex, district of residence, imputed presence of comorbidities and week of sample  
159 collection. Subgroup analyses were also performed to assess VE based on the age group.

160 Sensitivity analysis was conducted on an unmatched population using a multivariable logistic  
161 regression model, adjusted for age, sex, district of residence, presence of comorbidities and  
162 week of testing. Statistical significance was set at  $p\text{-value} < 0.05$ . All statistical analyses were  
163 conducted using STATA software version 15.0 (Stata Cooperation, College Station, Texas,  
164 USA).

165

166

167

## 168 **Results**

### 169 *Study population*

170 Total 109,050 RT-PCR test results were retrieved during the January 13 to June 30, 2021  
171 (Figure 1). Of which, 14,168 subjects were eligible for inclusion in the study. Of these, 2886  
172 (20.4%) were tested positive for SARS-CoV-2 and 11,282 (79.6%) tested negative for SARS-  
173 CoV-2 infection. Of these, 5518 (39%) matched case-control pairs were eligible for analysis  
174 after matching by age, sex, geography (district of residence), and week of testing.

175 The characteristics of the study population and matched case-control pairs were presented in  
176 Table 1. The median age of the overall study sample (n=14,168) was 50 years (interquartile  
177 range, 31-65 years); 50.8% were aged  $\geq 50$  years. Thirty percent (n=4259) resided in Denpasar  
178 city. Thirty four percent (n=4863) had received full vaccination; 42.5% (n=6016) had not  
179 received vaccine. Those who receiving positive RT-PCR test results were appeared much older,  
180 males, had at least one comorbidity and unvaccinated.

181 Among the case subjects, about 40% of subjects having comorbidities. Based on vaccination  
182 status, 16,4% (n=453) had received two doses of CoronaVac vaccine. Nineteen percent (n=535)  
183 case subjects had received the first dose of CoronaVac vaccine and about two-third (n=1771)  
184 were unvaccinated. While among participants in the control group, half of the participants  
185 (n=1485/2759) were unvaccinated. Twenty four percent had received two doses of CoronaVac  
186 vaccine.

187

### 188 *Vaccine effectiveness*

189 The unadjusted effectiveness of two doses of CoronaVac in preventing laboratory confirmed  
190 SARS-CoV-2 at least 14 days after administration was 73% (95% CI: 67-78) (Table 2). After  
191 adjusting for covariates, compared to unvaccinated adults, two dose of CoronaVac improved  
192 protection against SARS-CoV-2 infection (VE: 66.7%; 95% CI: 58.1-73.5) at  $\geq 14$  days after

193 the second dose. Partial vaccination with CoronaVac was not significantly associated with a  
194 reduced risk of laboratory-confirmed SARS-CoV-2 infection (VE: 14.5%; 95% CI: -11 to 34.2)  
195 at 0-13 days after the first dose. The effectiveness of CoronaVac vaccine against COVID-19  
196 infection was reduced with increasing age.

197 The adjusted VE in preventing COVID-19-related hospitalization and death was 71.1% (95%  
198 CI: 62.9-77.6) and 87.4% (95% CI: 65.1-95.4), respectively, at 14 days after the second dose  
199 (Table 3). Partial vaccination was less protective against COVID-19-related hospitalization and  
200 death among people aged 18 and older. Vaccine effectiveness against hospitalization was higher  
201 79.4% (95% CI: 70-85.9) in group of people aged  $\geq 50$  years relative to people aged 18-49 years  
202 (65.8%; 95% CI: 49.1-77). Death due to COVID-19 was not significantly associated with full  
203 vaccination in people aged 18-49 years (VE: 65.7%, 95% CI: -99.5 to 94.1). This result could  
204 be happened due to an effect of small sample size and small number of events (mortality).  
205 Among older population, vaccine effectiveness was 90.6% (95% CI: 61.5-97.7) in preventing  
206 death due to COVID-19.

207 To address potential issues related to the small sample size and rare event or outcome, we  
208 conducted a sensitivity analysis using unmatched population (n=14,168) (Supplementary Table  
209 S1 - Table S3). Overall, after adjusting all covariates, the vaccine effectiveness was 66.7%  
210 (95%CI: 61-71.5) in preventing laboratory confirmed SARS-CoV-2 infection at 14 days or  
211 more after the second dose administration. The effectiveness was relatively higher in adults  
212 aged 18-49 years (VE: 76.9; 95%CI: 77.3-86.6) compared to that older participants (VE: 69.4%,  
213 95%CI: 60.8-76.2), at 14 days after the second dose.

214 The effectiveness against hospitalization and death related to COVID-19 was 77.7% (95%CI:  
215 73.2-81.5) and 93.9% (95%CI: 85-97.6%), respectively, at 14 days after second dose. The  
216 effectiveness against both hospitalization and death due to COVID-19 was higher in that



217 population aged 50 years or older (82.6% and 94.4%, respectively) compared to group of people  
218 aged 18-49 years (71.8% and 88.1%, respectively).

219

## 220 **Discussion**

221 High proportion of inactivated vaccine of CoronaVac have been used in national COVID-19  
222 vaccination program in Indonesia. So far, this is the first health record-based observational  
223 study that provide real-world evidence on the effectiveness of COVID-19 vaccine against  
224 laboratory-confirmed SARS-CoV-2 infection, hospitalization, and death in Indonesian  
225 population. The study showed complete regimen of CoronaVac vaccine at least 14 days after  
226 the second dose had an effectiveness of 66.7% (95% CI: 58.1-73.5) against COVID-19 infection  
227 among Balinese adults aged  $\geq 18$  years. This finding is consistent with the results of phase III  
228 trial [5]. Yet, the effectiveness against infection was reduced by age. The effectiveness against  
229 infection was slightly lower in elderly aged 50 years and above (69.9%; 95% CI: 57.7-78.7)  
230 compared to younger adults (18-49 years) (77%, 95% CI: 66.6-84.2). This could be associated  
231 with the difference in immune response. It has been observed in older people that the antibody  
232 titre was rapidly degraded, the immune response was delay and the peak of neutralizing  
233 antibodies was relatively lower than younger populations [14]. These findings highlight the  
234 necessity for elderly-specific immunization approaches (e.g., vaccine formulations and  
235 administration).

236 Our real-world evidence on the effectiveness of CoronaVac against laboratory confirmed  
237 SARS-CoV-2 infection was consistent with that randomized controlled trials of vaccine  
238 efficacy in Indonesia (65.3%; 95%CI: 20-85.1) [2]. Yet, it was lower than that of vaccine  
239 efficacy reported in Turkey (83.5%; 95% CI: 65.4-92.1) and higher than that efficacy reported  
240 from Brazil (51%; 95%CI: 36-62) at 14 days after the second vaccination [3, 15]. Chilean cohort  
241 VE study involving general population aged  $\geq 16$  years old also demonstrated the VE was 65.9%

242 (95% CI: 65.2%-66.6%) against COVID-19 infection. While a TND case control study in Brazil  
243 demonstrated that two dose regimens of CoronaVac was effective in reducing risk of  
244 symptomatic COVID-19 (46.8%; 95% CI: 38.7% to 53.8%) at  $\geq 14$  days after the second dose  
245 among older population aged  $\geq 70$  years [7]. Another inactivated vaccine platform, BBV152 (a  
246 whole-virion inactivated vaccine manufactured by Bharat Biotech, Covaxin) which is used in  
247 India, has also been reported to be effective against COVID-19. A study reported that the  
248 effectiveness of against symptomatic COVID-19 was 50% (95% CI: 33–62) [16]. Compared to  
249 the effectiveness of CoronaVac vaccine, BBV152 effectiveness is slightly lower. The difference  
250 in the amount of transmission and the circulating SARS-CoV-2 variant are likely to have an  
251 impact on the results.

252 Our study showed that full vaccination of CoronaVac vaccine was also effective in preventing  
253 hospitalization and COVID-19-associated death. We estimated that CoronaVac vaccine was  
254 71.1% (95% CI: 62.9-77.6) for the prevention of hospitalization and 87.4% (95% CI: 65.1-95.4)  
255 for the prevention of COVID-19-related death at least 14 days after the second dose. While  
256 partial vaccination provided less protection against hospitalization and death due to COVID-  
257 19. None has reported CoronaVac VE estimates against these two outcomes in Indonesia. Our  
258 estimates, however, are dissimilar to that estimate reported elsewhere. A cohort study in Chile  
259 among adults aged  $\geq 16$  years showed that CoronaVac vaccine was 87.5% (95% CI, 86.7-88.2)  
260 effective against hospitalization and 86.3% (95% CI, 84.5-87.9) effective against COVID-19–  
261 related death [6, 17]. While a TND study in Brazil among elderly aged 70 years or older,  
262 CoronaVac was effective against COVID-19-related hospitalization (55.5%; 95% CI: 46.5-  
263 62.9) and death (61.2%, 95% CI: 48.9-70.5) at  $\geq 14$  days after the second dose, respectively [7].  
264 A study on another inactivated vaccine showed that the effectiveness of full vaccination of  
265 Sinopharm BBIBP-CorV was 79.8% (95% CI: 78–81.4) in preventing hospital admission and  
266 97.1% (83–99.9) in preventing death among Abu Dhabi residents aged 15 years and older [18];

267 which is slightly higher than our estimates on the effectiveness of CoronaVac. This discrepancy  
268 might be due to several factors including variation in study population and design (e.g., targeted  
269 age group, sample size) and difference in level of transmission or epidemiological setting (e.g.,  
270 a TND study in Brazil was conducted when P.1 or Gamma variant was predominant).

271 Our adjusted effectiveness

272 The strengths of this study are that: i) we used comprehensive health administrative database  
273 including individual laboratory test results, vaccination data and hospitalizations which include  
274 information on date of sample collection, type of vaccine, date of vaccination, date of hospital  
275 admission and underlying conditions; (ii) the subjects were chosen based on a standard  
276 laboratory confirmation for SARS-CoV-2 results. Thus, biases due to misclassification from  
277 infection or vaccination status were implausible. These findings are important to fill the gap in  
278 our knowledge regarding the performance of inactivated CoronaVac vaccine in the real-world;  
279 (iii) our analysis have sufficient of power (99.3%) as our matched case-control study involved  
280 large number of samples (2759 cases) with known vaccine effectiveness of 65% against  
281 symptomatic SARS-CoV-2  $\geq 14$  days after the second dose.

282 However, our study has limitations. First, while we attempted to make a robust approach by  
283 adjusting for number of potential confounding factors, including age, sex, geography, week of  
284 testing (sample collection) and presence of comorbidities, there might be still unmeasured  
285 confounding factors that biased the VE estimates (e.g., behavioral risk factors, type of variants).

286 Second, we did not have a detailed information on symptoms and date of onset in the record so  
287 that we could not identified and specifically examine the effectiveness against symptomatic  
288 cases. Third, as the data for date on onset were not available in the records, we used date of  
289 sample collection instead. There might be false-negative results included in the study so that  
290 this could affect our estimate. Lastly, this study was retrieved data from January to June 2021,  
291 which was just before the peak of Delta variants (B.1.617.2) outbreaks. Hence, the VE estimates

292 presented here is likely reflected vaccine performance before Delta and Omicron becoming  
293 predominant variant in the community. VE of CoronaVac against Delta and Omicron-related  
294 infection and severity might be different. Studies elsewhere have reported the effects of Delta  
295 variants on the COVID-19 vaccines performance [19, 20]. Further research is required to  
296 evaluate the effectiveness of CoronaVac against the circulating VOCs.

297

## 298 **Conclusions**

299 The two-dose regimens of inactivated CoronaVac vaccine was effective in preventing COVID-  
300 19 infection, hospitalizations for COVID-19 and COVID-19-related death in adults aged 18  
301 years or older. Full vaccination was significantly reduced the risk of severe outcomes especially  
302 among 50 years or older.

303

## 304 **Author contributions**

305 Study conceptualization: AS, PWD, RR (Ririn Ramadhany), MH. Methodology: AS, RR (Ririn  
306 Ramadhany), MH, PWD. Formal analysis: AS, RA, EHF, PWD, MH. Project administration:  
307 RA, RR (Rustika Rustika), KLT, TT. Data collection: AS, RA, EHF, AA, ILI, PWD.  
308 Supervision: PWD, RR (Ririn Ramadhany). Validation: PWD, RR (Rustika Rustika), KLT, TT.  
309 Funding: AS, TT, MH. Writing (original draft): AS, PWD. Writing (review and editing): all  
310 authors. All authors have read and approved the manuscript.

311

## 312 **Ethic statement**

313 The protocol of the study was approved by the Health Research Ethics Committee, National  
314 Institute of Health Research and Development, Ministry of Health, Indonesia (LB.  
315 02.01/2/KE.533/2021). The study was considered exempt from informed consent. No human  
316 health risks were identified.

317

318 **Conflict of interest**

319 The authors declare that they have no competing interests. None of us received shares or any  
320 kind monetary compensation linked to the distribution of CoronaVac in Indonesia or have any  
321 share or financial interests in Sinovac Life Sciences or parent companies.

322

323 **Data availability statement**

324 The datasets used and/or analyzed during the current study are protected by the Ministry of  
325 Health of Indonesia and are unsuitable for public sharing. Interested parties can apply for the  
326 data by contacting the data center of the Ministry of Health of Indonesia. All data generated or  
327 analyzed during this study are included in this published article (and its Supplementary  
328 information files). Aggregate data on vaccination and COVID-19 incidence are publicly  
329 available at <https://vaksin.kemkes.go.id/#/vaccines>

330

331 **Funding**

332 This study was funded by the National Institute of Health Research and Development, Ministry  
333 of Health, Indonesia. The funders had no role in study design, data collection and analysis,  
334 decision to publish, or preparation of the manuscript. The views expressed in this publication  
335 are those of the authors and not necessarily those of the Ministry of Health of Indonesia.

336

337 **Acknowledgment**

338 We would like to thank Dr. Anas Ma'ruf and team at the Center of Health Data and Information  
339 of Ministry of Health Indonesia, and Mr. Made Darmawan and Mr. Akbar Antony Siregar at  
340 the National COVID-19 Control and Economic Recovery Committee (KPC-PEN) for their  
341 assistance and support in collating the data. We would also like to thank the Ketut Suarjaya and

342 I Wayan Widia at Bali Provincial Health Office for their support in the implementation of this  
343 study and permission to access COVID-19 surveillance data.

344

345

## 346 **References**

- 347 1. Y. Zhang, G. Zeng, H. Pan, C. Li, Y. Hu, K. Chu, W. Han, Z. Chen, R. Tang, W. Yin, X.  
348 Chen, Y. Hu, X. Liu, C. Jiang, J. Li, M. Yang, Y. Song, X. Wang, Q. Gao, and F. Zhu,  
349 "Safety, tolerability, and immunogenicity of an inactivated SARS-CoV-2 vaccine in healthy  
350 adults aged 18-59 years: a randomised, double-blind, placebo-controlled, phase 1/2  
351 clinical trial," *Lancet Infect Dis*, vol. 21, no. 2, pp. 181-192, 2021.
- 352 2. Indonesia National Agency of Drug and Food Control, "Emergency Use Authorization -  
353 CoronaVac," Indonesia National Agency of Drug and Food Control Jakarta, 2021.
- 354 3. M. D. Tanriover, H. L. Doğanay, M. Akova, H. R. Güner, A. Azap, S. Akhan, Ş. Köse, F.  
355 Ş. Erdinç, E. H. Akalın, Ö. F. Tabak, H. Pullukçu, Ö. Batum, S. Şimşek Yavuz, Ö. Turhan,  
356 M. T. Yıldırım, İ. Köksal, Y. Taşova, V. Korten, G. Yılmaz, M. K. Çelen, S. Altın, İ. Çelik,  
357 Y. Bayındır, İ. Karaoğlan, A. Yılmaz, A. Özkul, H. Gür, S. Unal, and G. CoronaVac Study,  
358 "Efficacy and safety of an inactivated whole-virion SARS-CoV-2 vaccine (CoronaVac):  
359 interim results of a double-blind, randomised, placebo-controlled, phase 3 trial in Turkey,"  
360 *Lancet (London, England)*, vol. 398, no. 10296, pp. 213-222, 2021.
- 361 4. R. Palacios, E. G. Patiño, R. de Oliveira Piorelli, M. T. R. P. Conde, A. P. Batista, G. Zeng,  
362 Q. Xin, E. G. Kallas, J. Flores, C. F. Ockenhouse, and C. Gast, "Double-Blind,  
363 Randomized, Placebo-Controlled Phase III Clinical Trial to Evaluate the Efficacy and  
364 Safety of treating Healthcare Professionals with the Adsorbed COVID-19 (Inactivated)  
365 Vaccine Manufactured by Sinovac - PROFISCOV: A structured summary of a study  
366 protocol for a randomised controlled trial," *Trials*, vol. 21, no. 1, pp. 853-853, 2020.
- 367 5. E. Fadlyana, K. Rusmil, R. Tarigan, A. R. Rahmadi, S. Prodjosoeowojo, Y. Sofiatin, C. V.  
368 Khrisna, R. M. Sari, L. Setyaningsih, F. Surachman, N. S. Bachtiar, H. Sukandar, I.  
369 Megantara, C. Murad, K. N. A. Pangesti, V. Setiawaty, S. Sudigdoadi, Y. Hu, Q. Gao, and  
370 C. B. Kartasasmita, "A phase III, observer-blind, randomized, placebo-controlled study of  
371 the efficacy, safety, and immunogenicity of SARS-CoV-2 inactivated vaccine in healthy  
372 adults aged 18-59 years: An interim analysis in Indonesia," *Vaccine*, vol. 39, no. 44, pp.  
373 6520-6528, 2021.
- 374 6. Ministerio de Salud Gobierno de Chile, "Effectiveness of the inactivated CoronaVac  
375 vaccine against SARS-CoV-2 in Chile - Preliminary report," Ministerio de Salud, Chile, 2021.
- 376 7. O. T. Ranzani, M. D. T. Hitchings, M. Dorion, T. L. D'Agostini, R. C. de Paula, O. F. P. de  
377 Paula, E. F. M. Villela, M. S. S. Torres, S. B. de Oliveira, W. Schulz, M. Almiron, R. Said,

- 378 R. D. de Oliveira, P. Vieira da Silva, W. N. de Araújo, J. C. Gorinchteyn, J. R. Andrews,  
379 D. A. T. Cummings, A. I. Ko, and J. Croda, "Effectiveness of the CoronaVac vaccine in  
380 older adults during a gamma variant associated epidemic of covid-19 in Brazil: test  
381 negative case-control study," *Bmj*, vol. 374, pp. n2015, 2021.
- 382 8. G. Hanquet, M. Valenciano, F. Simondon, and A. Moren, "Vaccine effects and impact of  
383 vaccination programmes in post-licensure studies," *Vaccine*, vol. 31, no. 48, pp. 5634-42,  
384 2013.
- 385 9. Provincial Bureau of Statistics of Bali, *Bali in Figure 2021*, Provincial Bureau of Statistics  
386 of Bali, Denpasar, 2021.
- 387 10. Ministry of Health of Indonesia, "COVID-19 Vaccine Dashboard," Ministry of Health of  
388 Indonesia, <https://vaksin.kemkes.go.id/#/vaccines>.
- 389 11. M. K. Patel, I. Bergeri, J. S. Bresee, B. J. Cowling, N. S. Crowcroft, K. Fahmy, S. Hirve,  
390 G. Kang, M. A. Katz, C. F. Lanata, M. L'Azou Jackson, S. Joshi, M. Lipsitch, J. M. Mwenda,  
391 F. Nogareda, W. A. Orenstein, J. R. Ortiz, R. Pebody, S. J. Schrag, P. G. Smith, P.  
392 Srikantiah, L. Subissi, M. Valenciano, D. W. Vaughn, J. R. Verani, A. Wilder-Smith, and  
393 D. R. Feikin, "Evaluation of post-introduction COVID-19 vaccine effectiveness: Summary  
394 of interim guidance of the World Health Organization," *Vaccine*, vol. 39, no. 30, pp. 4013-  
395 4024, 2021.
- 396 12. Ministry of Health of Indonesia, *Guidelines on COVID-19 Prevention and Control, 5th*  
397 *revision* Ministry of Health of Indonesia, Jakarta, 2020.
- 398 13. W. A. Orenstein, R. H. Bernier, T. J. Dondero, A. R. Hinman, J. S. Marks, K. J. Bart, and  
399 B. Sirotkin, "Field evaluation of vaccine efficacy," *Bulletin of the World Health*  
400 *Organization*, vol. 63, no. 6, pp. 1055-1068, 1985.
- 401 14. D. A. Collier, I. Ferreira, P. Kotagiri, R. P. Datir, E. Y. Lim, E. Touizer, B. Meng, A.  
402 Abdullahi, A. Elmer, N. Kingston, B. Graves, E. Le Gresley, D. Caputo, L. Bergamaschi,  
403 K. G. C. Smith, J. R. Bradley, L. Ceron-Gutierrez, P. Cortes-Acevedo, G. Barcenas-  
404 Morales, M. A. Linterman, L. E. McCoy, C. Davis, E. Thomson, P. A. Lyons, E. McKinney,  
405 R. Doffinger, M. Wills, and R. K. Gupta, "Age-related immune response heterogeneity to  
406 SARS-CoV-2 vaccine BNT162b2," *Nature*, vol. 596, no. 7872, pp. 417-422, 2021.
- 407 15. World Health Organization, *Interim recommendations for use of the inactivated COVID-19*  
408 *vaccine, CoronaVac, developed by Sinovac (Interim Guidance 24 May 2021)*, World  
409 Health Organization, Geneva, 2021.
- 410 16. D. Desai, A. R. Khan, M. Soneja, A. Mittal, S. Naik, P. Kodan, A. Mandal, G. T. Maher, R.  
411 Kumar, A. Agarwal, N. R. Gowda, V. H, P. Kumar, S. Pandey, R. M. Pandey, A. Kumar,  
412 A. Ray, P. Jorwal, N. Nischal, A. Choudhary, M. Brijwal, K. Madan, R. Lodha, S. Sinha, L.  
413 Dar, N. Wig, and R. Guleria, "Effectiveness of an inactivated virus-based SARS-CoV-2

- 414 vaccine, BBV152, in India: a test-negative, case-control study," *The Lancet Infectious*  
415 *Diseases*, vol. 22, no. 3, pp. 349-356, 2022.
- 416 17. A. Jara, E. A. Undurraga, C. González, F. Paredes, T. Fontecilla, G. Jara, A. Pizarro, J.  
417 Acevedo, K. Leo, F. Leon, C. Sans, P. Leighton, P. Suárez, H. García-Escorza, and R.  
418 Araos, "Effectiveness of an Inactivated SARS-CoV-2 Vaccine in Chile," *New England*  
419 *Journal of Medicine*, vol. 385, no. 10, pp. 875-884, 2021.
- 420 18. F. Ismail AlHosani, A. Eduardo Stanciole, B. Aden, A. Timoshkin, O. Najim, W. Abbas  
421 Zaher, F. AlSayedsaleh AlDhaheeri, S. Al Mazrouie, T. A. Rizvi, and F. Mustafa, "Impact of  
422 the Sinopharm's BBIBP-CorV vaccine in preventing hospital admissions and death in  
423 infected vaccinees: Results from a retrospective study in the emirate of Abu Dhabi, United  
424 Arab Emirates (UAE)," *Vaccine*, pp. S0264-410X(22)00174-8, 2022.
- 425 19. J. Lopez Bernal, N. Andrews, C. Gower, E. Gallagher, R. Simmons, S. Thelwall, J. Stowe,  
426 E. Tessier, N. Groves, G. Dabrera, R. Myers, C. N. J. Campbell, G. Amirthalingam, M.  
427 Edmunds, M. Zambon, K. E. Brown, S. Hopkins, M. Chand, and M. Ramsay,  
428 "Effectiveness of Covid-19 Vaccines against the B.1.617.2 (Delta) Variant," *The New*  
429 *England journal of medicine*, vol. 385, no. 7, pp. 585-594, 2021.
- 430 20. X.-N. Li, Y. Huang, W. Wang, Q.-L. Jing, C.-H. Zhang, P.-Z. Qin, W.-J. Guan, L. Gan, Y.-  
431 L. Li, W.-H. Liu, H. Dong, Y.-T. Miao, S.-J. Fan, Z.-B. Zhang, D.-M. Zhang, and N.-S.  
432 Zhong, "Effectiveness of inactivated SARS-CoV-2 vaccines against the Delta variant  
433 infection in Guangzhou: a test-negative case-control real-world study," *Emerging*  
434 *microbes & infections*, vol. 10, no. 1, pp. 1751-1759, 2021.
- 435



1 **Table and Figure Legends**

2

3 **Table 1.** Characteristics of the adults aged  $\geq 18$  years eligible in the study and case-control  
4 pairs included in the analysis

5

6 **Table 2.** CoronaVac vaccine effectiveness against laboratory-confirmed SARS-CoV-2  
7 infection in adults aged  $\geq 18$  years in Bali, Indonesia, all age and stratified by age group

8

9 **Table 3.** CoronaVac vaccine effectiveness in preventing hospitalization and COVID-19-  
10 related death in adults aged  $\geq 18$  years in Bali, Indonesia, all ages and stratified by age group

11

12

13 **Figure 1.** Flowchart for case and control selection

14

15 **Figure 2.** Trends in COVID-19 incidence in Bali over the period of study (Data source:  
16 Ministry of Health of Indonesia).

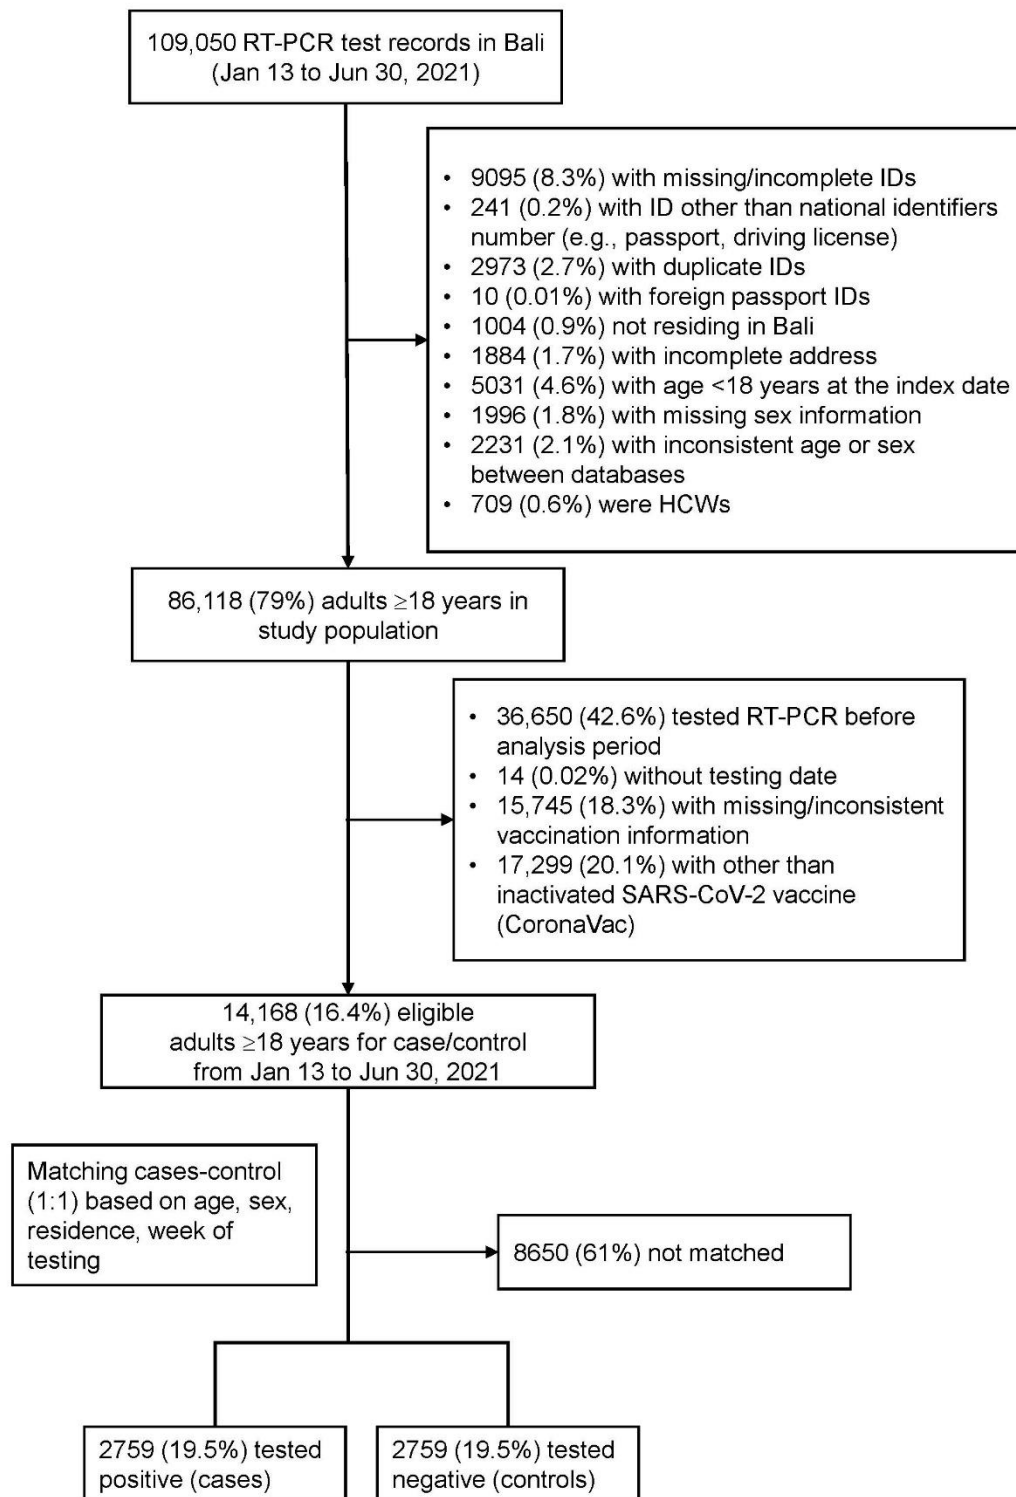

**Figure 1.** Flowchart for case and control selection

17  
18  
19  
20  
21

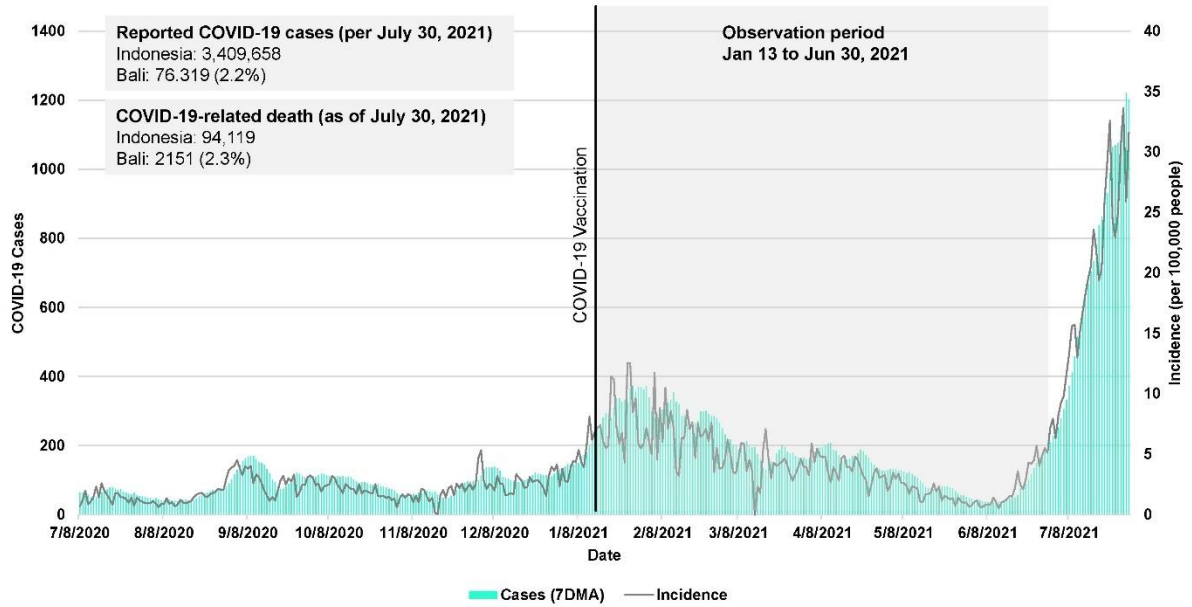

22  
23  
24  
25  
26  
27  
28  
29  
30  
31  
32  
33  
34  
35  
36  
37  
38  
39  
40  
41  
42  
43  
44  
45  
46  
47  
48  
49  
50  
51  
52  
53

**Figure 2.** Trends in COVID-19 incidence in Bali over the period of study (Data source: Ministry of Health of Indonesia).

54 **Table 1.** Characteristics of the adults aged  $\geq 18$  years eligible in the study and case-control  
 55 pairs included in the analysis  
 56

| Characteristics                             | Total         | Eligible study population    |                                | Matched pairs  |                   |
|---------------------------------------------|---------------|------------------------------|--------------------------------|----------------|-------------------|
|                                             |               | Positive SARS-CoV-2 (n=2886) | Negative SARS-CoV-2 (n=11,282) | Cases (n=2759) | Controls (n=2759) |
| <b>Age, years, median (IQR)</b>             | 50 (31-65)    | 61 (45-69)                   | 46 (30-64)                     | 61 (45-69)     | 60 (41-70)        |
| <b>Age group, n (%)</b>                     |               |                              |                                |                |                   |
| 18-49 y                                     | 6969 (49.2)   | 853 (29.6)                   | 6116 (54.2)                    | 847 (30.7)     | 847 (30.7)        |
| $\geq 50$ y                                 | 7199 (50.8)   | 2033 (70.4)                  | 5166 (45.8)                    | 1912 (69.3)    | 1912 (69.3)       |
| <b>Sex</b>                                  |               |                              |                                |                |                   |
| Male                                        | 7676 (54.2)   | 1730 (59.9)                  | 5946 (52.7)                    | 1648 (59.7)    | 1648 (59.7)       |
| Female                                      | 6492 (45.8)   | 1156 (40.1)                  | 5336 (47.3)                    | 1111 (40.3)    | 1111 (40.3)       |
| <b>District of residence, n (%)</b>         |               |                              |                                |                |                   |
| Jembrana                                    | 564 (4)       | 87 (3)                       | 477 (4.2)                      | 75 (2.7)       | 75 (2.7)          |
| Tabanan                                     | 1500 (10.6)   | 233 (8.1)                    | 1267 (11.2)                    | 233 (8.5)      | 233 (8.5)         |
| Badung                                      | 2031 (14.3)   | 474 (16.4)                   | 1557 (13.8)                    | 465 (16.7)     | 456 (16.7)        |
| Gianyar                                     | 1573 (11.1)   | 408 (14.1)                   | 1165 (10.3)                    | 363 (13.2)     | 363 (13.2)        |
| Klungkung                                   | 554 (3.9)     | 79 (2.7)                     | 475 (4.2)                      | 73 (2.7)       | 73 (2.7)          |
| Bangli                                      | 803 (5.7)     | 222 (7.7)                    | 581 (5.2)                      | 202 (7.3)      | 202 (7.3)         |
| Karangasem                                  | 916 (6.5)     | 144 (5)                      | 772 (6.8)                      | 138 (5)        | 138 (5)           |
| Buleleng                                    | 1968 (13.9)   | 353 (12.2)                   | 1615 (14.3)                    | 343 (12.4)     | 343 (12.4)        |
| Denpasar                                    | 4259 (30.1)   | 886 (30.7)                   | 3373 (29.9)                    | 867 (31.4)     | 867 (31.4)        |
| <b>Reported No. of comorbidities, n (%)</b> |               |                              |                                |                |                   |
| No                                          | 12,158 (85.8) | 1698 (58.8)                  | 10,460 (92.7)                  | 1636 (59.3)    | 2473 (89.6)       |
| Yes                                         | 2010 (14.2)   | 1188 (41.2)                  | 822 (7.3)                      | 1123 (40.7)    | 286 (10.4)        |
| <b>Vaccination status, n (%)</b>            |               |                              |                                |                |                   |
| Unvaccinated                                | 6016 (42.5)   | 1867 (64.7)                  | 4149 (36.8)                    | 1771 (64.2)    | 1469 (53.3)       |
| 1st dose (0-13 days)                        | 1001 (7.1)    | 222 (7.7)                    | 779 (6.9)                      | 216 (7.8)      | 193 (7)           |
| 1st dose ( $\geq 14$ days)                  | 1408 (9.9)    | 340 (11.8)                   | 1068 (9.5)                     | 319 (11.6)     | 272 (9.9)         |
| 2nd dose (0-13 days)                        | 880 (6.2)     | 77 (2.7)                     | 803 (7.1)                      | 74 (2.7)       | 158 (5.7)         |
| 2nd dose ( $\geq 14$ days)                  | 4863 (34.3)   | 380 (13.2)                   | 4483 (39.7)                    | 379 (13.7)     | 667 (24.2)        |

57  
 58  
 59  
 60  
 61  
 62  
 63  
 64  
 65  
 66  
 67  
 68  
 69  
 70  
 71  
 72  
 73  
 74

75  
76  
77  
78

**Table 2.** CoronaVac vaccine effectiveness against laboratory-confirmed SARS-CoV-2 infection in adults aged  $\geq 18$  years in Bali, Indonesia, all age and stratified by age group

|                                              | Cases<br>(SARS-CoV-2<br>RT-PCR-<br>positive) | Controls<br>(SARS-CoV-2<br>RT-PCR-<br>negative) | Unadjusted<br>OR (95% CI) | Unadjusted<br>p-value | Adjusted OR*<br>(95% CI) | Adjusted<br>p-value | Adjusted VE<br>(95% CI) |
|----------------------------------------------|----------------------------------------------|-------------------------------------------------|---------------------------|-----------------------|--------------------------|---------------------|-------------------------|
| Unvaccinated                                 | 1771 (64.2)                                  | 1469 (53.3)                                     | Ref                       |                       | Ref                      |                     |                         |
| 0-13 days after 1 <sup>st</sup> dose         | 216 (7.8)                                    | 193 (7)                                         | 0.77 (0.61-0.98)          | 0.03                  | 0.85 (0.66-1.11)         | 0.239               | 14.5 (-11 – 34.2)       |
| $\geq 14$ days after 1 <sup>st</sup> dose    | 319 (11.6)                                   | 272 (9.9)                                       | 0.76 (0.62-0.93)          | 0.007                 | 0.89 (0.71-1.12)         | 0.332               | 10.5 (-12 – 28.6)       |
| 0-13 days after 2 <sup>nd</sup> dose         | 74 (2.7)                                     | 158 (5.7)                                       | 0.33 (0.24-0.45)          | <0.0001               | 0.37 (0.26-0.52)         | <0.0001             | 63.1 (48.5-73.6)        |
| $\geq 14$ days after 2 <sup>nd</sup> dose    | 379 (13.7)                                   | 667 (24.2)                                      | 0.27 (0.22-0.33)          | <0.0001               | 0.33 (0.26-0.42)         | <0.0001             | 66.7 (58.1-73.5)        |
| <b>Age group: 18-49 years</b>                |                                              |                                                 |                           |                       |                          |                     |                         |
| Unvaccinated                                 | 247 (29.2)                                   | 95 (11.2)                                       | Ref                       |                       | Ref                      |                     |                         |
| 0-13 days after 1 <sup>st</sup> dose         | 133 (15.7)                                   | 122 (14.4)                                      | 0.43 (0.29-0.62)          | <0.0001               | 0.52 (0.35-0.77)         | <0.0001             | 48.3 (22.6-65.5)        |
| $\geq 14$ days after 1 <sup>st</sup> dose    | 144 (17)                                     | 131 (15.5)                                      | 0.34 (0.23-0.51)          | <0.0001               | 0.45 (0.30-0.68)         | <0.0001             | 55.1 (32-70.4)          |
| 0-13 days after 2 <sup>nd</sup> dose         | 39 (4.6)                                     | 79 (9.3)                                        | 0.20 (0.12-0.32)          | <0.0001               | 0.22 (0.13-0.36)         | <0.0001             | 78.2 (63.6-87)          |
| $\geq 14$ days after 2 <sup>nd</sup> dose    | 284 (33.5)                                   | 420 (49.6)                                      | 0.18 (0.12-0.25)          | <0.0001               | 0.23 (0.16-0.33)         | <0.0001             | 77 (66.6-84.2)          |
| <b>Age group: <math>\geq 50</math> years</b> |                                              |                                                 |                           |                       |                          |                     |                         |
| Unvaccinated                                 | 1524 (79.7)                                  | 1374 (71.9)                                     | Ref                       |                       | Ref                      |                     |                         |
| 0-13 days after 1 <sup>st</sup> dose         | 83 (4.3)                                     | 71 (3.7)                                        | 1.05 (0.75-1.47)          | 0.775                 | 1.11 (0.74-1.64)         | 0.617               | -10.6 (-64.3– 25.5)     |
| $\geq 14$ days after 1 <sup>st</sup> dose    | 175 (9.2)                                    | 141 (7.4)                                       | 1.02 (0.80-1.30)          | 0.874                 | 1.13 (0.85-1.51)         | 0.396               | -13.2 (-50.6 – 14.9)    |
| 0-13 days after 2 <sup>nd</sup> dose         | 35 (1.8)                                     | 79 (4.1)                                        | 0.38 (0.25-0.58)          | <0.0001               | 0.42 (0.26-0.68)         | <0.0001             | 58.1 (32.4-74)          |
| $\geq 14$ days after 2 <sup>nd</sup> dose    | 95 (4.9)                                     | 247 (12.9)                                      | 0.26 (0.19-0.35)          | <0.0001               | 0.30 (0.21-0.42)         | <0.0001             | 69.9 (57.7-78.7)        |

79  
80  
81  
82  
83  
84  
85  
86

Abbreviations: OR, odds ratio; VE, vaccine effectiveness

\*Adjusted for age (as continuous), presence of comorbidities and prior SARS-CoV-2 infection

† Vaccine effectiveness is calculated as (1- odds ratio) x 100%

87 **Table 3.** CoronaVac vaccine effectiveness in preventing hospitalization and COVID-19-related death in adults aged  $\geq 18$  years in Bali,  
 88 Indonesia, all ages and stratified by age group  
 89

|                                              | Hospitalization |                         |                     |                  | Death due to COVID-19 |                         |                     |                    |
|----------------------------------------------|-----------------|-------------------------|---------------------|------------------|-----------------------|-------------------------|---------------------|--------------------|
|                                              | n/N             | Adjusted OR<br>(95% CI) | Adjusted<br>p-value | VE*<br>% (95%CI) | n/N                   | Adjusted OR<br>(95% CI) | Adjusted<br>p-value | VE*<br>% (95%CI)   |
| Unvaccinated                                 | 1932/3240       | Ref                     |                     |                  | 450/3240              | Ref                     |                     |                    |
| 0-13 days after 1 <sup>st</sup> dose         | 124/409         | 0.72 (0.54-0.95)        | 0.019               | 28.3 (5.3-45.7)  | 10/409                | 0.46 (0.24-0.90)        | 0.023               | 53.9 (10-76.3)     |
| $\geq 14$ days after 1 <sup>st</sup> dose    | 218/591         | 0.66 (0.52-0.84)        | 0.001               | 34.1 (16.4-48.1) | 15/591                | 0.41 (0.24-0.72)        | 0.002               | 58.6 (28.3-76.1)   |
| 0-13 days after 2 <sup>nd</sup> dose         | 50/232          | 0.39 (0.26-0.57)        | <0.0001             | 61.2 (42.6-73.7) | 3/232                 | 0.24 (0.07-0.77)        | 0.017               | 76 (22.9-92.5)     |
| $\geq 14$ days after 2 <sup>nd</sup> dose    | 166/1048        | 0.29 (0.22-0.37)        | <0.0001             | 71.1 (62.9-77.6) | 4/1046                | 0.13 (0.05-0.35)        | <0.0001             | 87.4 (65.1-95.4)   |
| <b>Age group: 18-49 years</b>                |                 |                         |                     |                  |                       |                         |                     |                    |
| Unvaccinated                                 | 123/342         |                         |                     | Ref              | 11/342                |                         |                     | Ref                |
| 0-13 days after 1 <sup>st</sup> dose         | 53/255          | 0.66 (0.43-1.02)        | 0.062               | 33.7 (-2.1-56.9) | 0/255                 | 1                       | -                   | NA**               |
| $\geq 14$ days after 1 <sup>st</sup> dose    | 65/275          | 0.67 (0.44-1.02)        | 0.064               | 32.6 (-2.3-55.6) | 1/275                 | 0.22 (0.02-2.05)        | 0.184               | 77.9 (-105.4-97.6) |
| 0-13 days after 2 <sup>nd</sup> dose         | 16/118          | 0.33 (0.17-0.65)        | 0.001               | 66.9 (35-83.2)   | 1/118                 | 0.30 (0.03-2.97)        | 0.303               | 70 (-196.5-97)     |
| $\geq 14$ days after 2 <sup>nd</sup> dose    | 99/704          | 0.35 (0.23-0.52)        | <0.0001             | 65.1 (48-76.5)   | 2/704                 | 0.45 (0.07-2.80)        | 0.390               | 55.3 (-180.2-92.9) |
| <b>Age group: <math>\geq 50</math> years</b> |                 |                         |                     |                  |                       |                         |                     |                    |
| Unvaccinated                                 | 1809/2898       |                         |                     | Ref              | 439/2898              |                         |                     | Ref                |
| 0-13 days after 1 <sup>st</sup> dose         | 71/154          | 0.86 (0.58-1.27)        | 0.446               | 14.1 (-27.1-42)  | 10/154                | 0.65 (0.33-1.28)        | 0.213               | 34.9 (-28-66.9)    |
| $\geq 14$ days after 1 <sup>st</sup> dose    | 153/316         | 0.67 (0.50-0.90)        | 0.009               | 32.9 (9.5-50.2)  | 14/316                | 0.45 (0.25-0.79)        | 0.005               | 55.2 (21.1-74.6)   |
| 0-13 days after 2 <sup>nd</sup> dose         | 34/114          | 0.44 (0.27-0.72)        | 0.001               | 55.9 (28-72.9)   | 2/114                 | 0.20 (0.05-0.82)        | 0.025               | 80.2 (18.1-95.2)   |
| $\geq 14$ days after 2 <sup>nd</sup> dose    | 67/342          | 0.21 (0.15-0.30)        | <0.0001             | 79 (69.7-85.5)   | 2/342                 | 0.09 (0.02-0.37)        | 0.001               | 90.9 (62.6-97.8)   |

90 Abbreviations: OR, odds ratio; VE, vaccine effectiveness; CI, confidence interval

91 \*Adjusted for age (as continuous), sex, presence of comorbidities and prior SARS-CoV-2 infection, week of testing, district of residence. OR is estimated using  
 92 multivariable regression model.

93 \*\*The CI could not be estimated owing to zero/few events in the group.

94

95

96

97
